# Supplementary material for: SRC is a potential target of Arctigenin in treating triple-negative breast cancer: based on machine learning algorithms, molecular modeling and in Vitro test
Source: Front Mol Biosci. 2025 Sep 11;12:1644169. doi: 10.3389/fmolb.2025.1644169 (PMC12460110; doi:10.3389/fmolb.2025.1644169)
Supplement: Supplementary file 4 [file Table1.xlsx]

## Sheet: Table S1
Supplementary Table S1: Information of the AG' targets, Differentially expressed genes, Module genes in WGCNA and the key targets
Drugs targets	DEGs	WGCNA-brown module	Key targets
MAPK1	HJURP	A2M	ABCG2
AR	CD300LG	A2ML1	ALPL
MAPK10	KIF14	AACSP1	ANG
CFB	SGO1	AADACL2-AS1	AR
CA2	EXO1	AADAT	AURKA
GSTP1	SKA1	AARS1	AURKB
MAPK8	ASPM	AARS2	CCNA2
KIF11	CDC25C	AASDH	CDC25B
PIM1	CAVIN2	AASS	CDC25C
BACE1	TROAP	AATBC	CDK5R1
AURKA	VEGFD	ABCA13	CHEK1
MAPK14	KIF18B	ABCA2	CLK1
PNP	DEPDC1	ABCA3	EGFR
CTSD	KIF4A	ABCA5	KIF11
MAPKAPK2	CKAP2L	ABCB1	MAOB
CYP19A1	PKMYT1	ABCB10	MMP13
PPIA	ERCC6L	ABCB5	MMP3
FAP	POLQ	ABCB8	NR3C2
CHEK1	CAPN11	ABCB9	PARP1
ESR1	MCM10	ABCC1	PDGFRB
BCHE	DEPDC1B	ABCC10	PKIA
DDX6	ADAM33	ABCC3	PLK1
CDK2	NEK2	ABCC4	PLK4
KDR	NEIL3	ABCC5	QPCT
ESR2	ATP1A2	ABCC6P2	RIPK2
TTR	BUB1	ABCD1	SPHK1
GBA	ESPL1	ABCD3	SRC
EGFR	NOVA1	ABCD4	TYMS
F2	KIF2C	ABCE1
CDK5R1	GTSE1	ABCG1
TREM1	ANKRD29	ABCG2
CES1	PAMR1	ABHD14B
CCNA2	TPX2	ABHD3
EPHB4	ZBTB16	ABHD4
CASP7	CDCA8	ABI2
RTN4R	SCN4B	ABL2
PDE4B	MAB21L1	ABLIM1
ADAM17	CEP55	ABO
ESRRG	MTFR2	ABR
MMP3	DLGAP5	ABRACL
SHBG	ORC6	ABRAXAS1
CASP3	NUF2	ABTB1
NQO2	CLSPN	ABTB2
AKR1B1	MELK	ACACA
CA12	AURKA	ACAD8
PGR	KNL1	ACADVL
CLPP	CDCA2	ACAN
NR1H2	ANLN	ACAP3
MAOB	TICRR	ACAT2
MTAP	IQGAP3	ACBD3
SULT2A1	PIMREG	ACBD4
ALB	CENPA	ACBD5
METAP2	PLK1	ACBD7
PDE4D	CDC20	ACCS
HSD17B1	CCNB2	ACKR1
NR3C2	KIF20A	ACLY
ANXA5	CDCA3	ACOT11
PAH	COL10A1	ACOX2
CTSB	KIFC1	ACOX3
RXRA	FAM83D	ACP1
MMP13	UBE2C	ACP7
CDK6	FGF10	ACR
ANG	DIAPH3	ACRV1
CSNK1G2	BUB1B	ACSF2
SRC	CENPF	ACSL5
PPARG	SKA3	ACSL6
REN	CDCA5	ACSM4
PPARD	E2F2	ACTB
BMP7	LINC01614	ACTG1P1
GSR	CCNA2	ACTG1P20
AMD1	PTENP1-AS	ACTG1P22
FNTA	NCAPH	ACTG1P25
FABP4	FAXDC2	ACTG2
TGFBR1	TTK	ACTL6A
GC	CIT	ACTL8
HSP90AA1	NCAPG	ACTN1
NQO1	ESCO2	ACTR1B
NOS3	RRM2	ACTR2
MIF	CCNB1	ACTR3
RORA	NDC80	ACTR3B
PLK1	CENPE	ACTRT3
PDPK1	PDGFD	ACVR1
GSK3B	AURKB	ACVR2A
BRAF	CDKN3	ACVR2B
MMP8	KIF23	ACYP1
HSD11B1	EZH1	ADAM15
HSPA8	SCARA5	ADAM17
AKR1C3	PCLAF	ADAM8
PNPO	ZBTB4	ADAMDEC1
AKT1	PRR11	ADAMTS1
DPP4	PTTG1	ADAMTS13
BCAT2	UBE2T	ADAMTS15
SORD	BTNL9	ADAMTS17
PKIA	CDK1	ADAMTS19
STS	ABCA8	ADAMTS4
AKR1C1	ADCYAP1R1	ADAMTS5
LCK	SPC24	ADAMTS9-AS2
ADH1B	CALCOCO1	ADAMTSL2
CA1	SHCBP1	ADAMTSL4-AS2
CFD	ASF1B	ADAMTSL5
MAP2K1	BIRC5	ADAR
LYPLA1	CTTNBP2	ADAT2
LYPLA2	KIF11	ADCY1
SLC6A3	AQP7	ADCY10P1
SLC6A2	KPNA2	ADCY2
ALOX5	AL133482.1	ADCY6
HTR1A	TCEAL7	ADCY6-DT
HSD17B2	HSD17B6	ADCY9
ALOX15	GPIHBP1	ADCYAP1
HSD11B1	SPAG5	ADD1
RAF1	KIF18A	ADD2
DYRK1A	RAD51	ADGRA2
RET	ATOH8	ADGRB1
RIPK2	TACC3	ADGRB2
PDK1	ALDH1A2	ADGRE1
WEE1	MYBL2	ADGRE2
CTSS	KIF15	ADGRF4
PTGES	UHRF1	ADGRG6
LNPEP	LHFPL6	ADGRL2
CDK5R1	LMOD1	ADGRL3
ALPL	TMEM132C	ADH4
AURKB	ZNF695	ADH7
RORC	FANCA	ADIRF-AS1
CDC25C	PBK	ADM2
JAK2	FOXM1	ADORA2B
CDC25B	BRIP1	ADPRM
CDK4	ARHGEF39	ADPRS
SPHK1	CENPI	ADRA2A
MAOA	PDE2A	AEN
ERN1	STIL	AFAP1
DNM1	TSHZ2	AFAP1-AS1
TBXA2R	AVPR2	AFG3L2
RPS6KA3	ADCY5	AGAP1
ALOX12	KL	AGAP1-IT1
VCP	MKI67	AGAP13P
ADORA2A	EZH2	AGAP9
ADORA2B	ARHGAP20	AGBL5
MTOR	GPRASP1	AGBL5-IT1
PIK3CA	MYH11	AGFG2
PTK2B	TNMD	AGL
SYK	LRP8	AGMAT
PIK3CG	PGM5	AGO2
ABCG2	MMP1	AGPAT4
MMP14	RTKN2	AGPAT5
QPCT	CRY2	AGTPBP1
HTT	GINS1	AGTRAP
PARP1	JAM2	AHCTF1
PIM2	RAD54B	AHCYL2
TNKS2	E2F7	AHNAK
TNKS	LINC02884	AHR
GRM1	SPARCL1	AHSA2P
PLK4	CLEC5A	AIFM1
BAD	CDC45	AIMP2
CLK1	TOP2A	AJ003147.2
PIM3	HMGB3	AJM1
TBK1	SPC25	AK3P3
DYRK1B	AUNIP	AK4
CCNB3	TNXB	AK7
CCND3	IGFBP6	AK8
CSNK1A1	TRIP13	AKAP1
AGPAT2	CHEK1	AKAP3
APP	RAPGEF3	AKAP6
PITRM1	OGN	AKR1B10
HTR6	DTL	AKR1E2
CLK3	AC091057.1	AKR7A2
DYRK2	CBX7	AKT1
NOX4	DBF4	AKT3
SMARCA2	PEAR1	ALAD
BACE2	RACGAP1	ALDH1A1
ABL1	SPRY1	ALDH1A3
TYMS	LRRN4CL	ALDH1B1
PIK3CD	EME1	ALDH1L2
PRKDC	CENPL	ALDH3A1
PIK3CB	MME	ALDH9A1
HCK	TNS2	ALDOA
LYN	LMNB1	ALG1
TXK	AGTR1	ALG10
PTGFR	KLHDC1	ALG10B
FLT1	HHIP	ALG1L
PDGFRB	CKS2	ALG1L3P
TNNI3K	ADAMTS5	ALG1L5P
RAC1	CENPO	ALG1L6P
CSF1R	HMMR	ALG1L8P
	SYNPO2	ALG1L9P
	SEMA6D	ALG6
	CAV1	ALG8
	THSD1	ALK
	ABLIM3	ALKAL1
	GDF10	ALKAL2
	ITIH5	ALKBH3
	ORC1	ALKBH8
	CENPU	ALMS1
	CDC6	ALMS1-IT1
	CBX2	ALPL
	TRIM59	ALS2CL
	AL445259.1	ALX1
	AP001528.2	ALX3
	MAMDC2	ALYREF
	ADH1C	AMD1
	AUXG01000058.1	AMDHD1
	ZNF300P1	AMER1
	RAI2	AMH
	PLPP1	AMIGO1
	VAMP2	AMMECR1
	AC063919.1	AMN
	GPR19	AMOT
	CIP2A	AMOTL1
	TK1	AMOTL2
	MAGI2-AS3	AMPD1
	GPC3	AMPD2
	LDB2	AMTN
	CDC25A	AMY2B
	AC012073.1	ANAPC1
	MATN2	ANAPC13
	HNRNPA1P21	ANG
	FAM198B-AS1	ANKEF1
	ITM2A	ANKH
	SEMA3G	ANKLE1
	NTRK2	ANKMY2
	COL11A1	ANKRD1
	PDK4	ANKRD13B
	CCDC170	ANKRD13D
	BLM	ANKRD16
	CNIH2	ANKRD18EP
	TEDC2	ANKRD22
	UBE2S	ANKRD26
	LINC01589	ANKRD27
	ARHGAP11A	ANKRD30BP3
	RECQL4	ANKRD35
	AC091175.1	ANKRD36BP2
	CD36	ANKRD37
	RBMS3	ANKRD42
	PHYHIP	ANKRD65
	AL049775.1	ANLN
	CTPS1	ANO7
	CCNE1	ANO7L1
	PAQR4	ANO8
	TRMT9B	ANOS1
	CYBRD1	ANP32B
	CARMN	ANP32E
	SPRY2	ANPEP
	NOSTRIN	ANXA1
	XRCC2	ANXA11
	RAD51AP1	ANXA3
	TONSL	AOC1
	CHL1	AOPEP
	IBSP	AP1S1
	CEP68	AP1S3
	ANGPTL1	AP2B1
	TGFBR3	AP3M1
	EMCN	AP3M2
	HLF	AP5B1
	TXNIP	AP5Z1
	CD34	APBA1
	CLEC3B	APBA2
	AP000251.1	APBB1
	POLH-AS1	APBB2
	PACC1	APBB3
	PCDH19	APCDD1
	FAM111B	APEH
	FBXL5	APEX2
	DUSP1	APH1A
	CFD	APH1B
	MEIS1-AS2	APLP1
	FAM13C	APLP2
	SRPX	APOBEC3A
	MIR145	APOBEC3B
	CLDN5	APOBEC3C
	PSRC1	APOBR
	CXCL12	APOC1
	CENPM	APOD
	GPRIN1	APOM
	TUBA1C	APOO
	LIFR	APPBP2
	TGFBR2	AQP1
	JPT1	AQP3
	PRIM2	AQP4
	TNS1	AR
	PPP1R12B	ARAP1
	NR3C2	ARC
	GSN	ARF1
	STAT5B	ARFGEF1
	MYRIP	ARFGEF3
	GIPC2	ARG2
	FAM72B	ARGLU1
	E2F3	ARHGAP11A
	E2F1	ARHGAP12
	ZWINT	ARHGAP22
	DNAH14	ARHGAP23
	COL6A6	ARHGAP26
	GSTM2	ARHGAP27
	ADH1B	ARHGAP29
	KLHDC7B-DT	ARHGAP31-AS1
	PLK4	ARHGAP33
	FABP4	ARHGAP35
	PLPP3	ARHGAP44
	FANCI	ARHGAP5-AS1
	DIXDC1	ARHGEF1
	DIPK2B	ARHGEF11
	CRIM1	ARHGEF17
	PLSCR4	ARHGEF2
	GSTM5	ARHGEF25
	PER1	ARHGEF26-AS1
	LINC02587	ARHGEF28
	MMRN2	ARHGEF3
	MAD2L1	ARHGEF34P
	AC113133.1	ARHGEF38-IT1
	CORO2B	ARHGEF39
	CDC7	ARHGEF40
	MAOA	ARHGEF6
	MTHFD2	ARHGEF9
	ECRG4	ARID3A
	POC1A	ARID5B
	IL21R	ARL10
	USHBP1	ARL11
	CEP126	ARL13B
	GNG11	ARL14
	CDT1	ARL15
	HDGF	ARL4D
	MEOX2	ARL5B
	CLDN11	ARL6
	LEPR	ARL6IP1
	TMTC1	ARL6IP5
	KIAA0408	ARL6IP6
	ARRB1	ARL9
	HELLS	ARMC1
	IL6ST	ARMC2-AS1
	AC112777.1	ARMC3
	ADCY4	ARMCX1
	CA4	ARMCX2
	MRGPRX2	ARMCX3
	FEN1	ARMCX4
	LINC00511	ARNTL
	PPIAP56	ARPC1A
	NKAPL	ARPC3P3
	FGF1	ARPC5
	CIRBP	ARRB1
	SUV39H2	ARRDC2
	NEK9	ARRDC3
	THRB	ARRDC4
	IGSF10	ARSA
	AC007637.1	ARSF
	DACH1	ARSG
	PLAC9	ARSI
	AL928921.1	ARSJ
	AL845331.2	ART3
	STMN1	ART4
	GEN1	ART5
	LTBP4	ARTN
	PIF1	ARV1
	SH3D19	ASAH2B
	ADRB2	ASAP1
	KLF9	ASAP3
	WDR19	ASB1
	FREM1	ASB8
	RNFT2	ASCC3
	CCDC167	ASCL2
	MMP11	ASF1A
	DCAF13	ASF1B
	ACVR1C	ASH1L-AS1
	MCM4	ASIC3
	CHRDL1	ASNSP1
	MLXIPL	ASPHD1
	CENPN	ASPHD2
	ACACB	ASPM
	ACKR1	ASRGL1
	DELE1	ASTN1
	CPE	ATAD1
	SCUBE2	ATAD2
	TMEM178A	ATAD2B
	TCEAL5	ATAD3B
	CENPK	ATAD5
	LRIG1	ATE1
	COX7A1	ATE1-AS1
	LIN7A	ATF3
	FP325317.2	ATF5
	RAD54L	ATF7
	KLHL29	ATF7IP2
	MSRB3	ATG16L2
	NDN	ATG9B
	AHNAK	ATIC
	SLIT3	ATL1
	LURAP1	ATP11A
	ABCB1	ATP11C
	C10orf88B	ATP12A
	BAK1	ATP13A2
	TMEM255A	ATP13A3
	EEF1AKMT4	ATP1B2
	GASK1B	ATP1B3
	RPLP0P2	ATP2B1
	INMT	ATP2B1-AS1
	RUNX1T1	ATP2B2
	FANCB	ATP5F1C
	CAB39L	ATP5MDP1
	INTS7	ATP5MF
	KNSTRN	ATP5MFP2
	EGR1	ATP5MGP1
	TRARG1	ATP6V0D2
	CCNF	ATP6V1C2
	MFAP4	ATP6V1E2
	SELENOP	ATP7B
	SRPK1	ATP8A1
	NISCH	ATP8A2
	PARPBP	ATP8B2
	THRA	ATRN
	LETMD1	ATRNL1
	DONSON	ATXN1-AS1
	SH3BGRL2	AUH
	NMU	AUNIP
	PPP1R14A	AURKA
	MMP13	AURKB
	ABCA9	AVIL
	OTX1	AWAT2
	FOXP3	AXIN2
	RMI2	AXL
	AF067845.1	AZIN1
	LEP	AZU1
	TSPAN7	B3GALNT1
	SLC7A5	B3GALNT2
	DDX11-AS1	B3GLCT
	CCNDBP1	B3GNT4
	SVEP1	B3GNT5
	EBF1	B3GNT7
	AQP7P3	B3GNT8
	APH1B	B3GNT9
	DDIAS	B4GALNT1
	GHR	B4GALT3
	INHBA	B4GALT4
	TPCN1	B4GAT1
	FXYD1	BAALC-AS1
	FHL1	BACE2
	AOC3	BACH2
	DNAJC18	BAG1
	CDCA4	BAG3
	SLC35A2	BAHCC1
	GINS4	BAIAP2L2
	AC107959.1	BAIAP3
	KREMEN2	BAK1
	AC021739.2	BANCR
	TMEM220	BANF1P2
	MEG3	BANF1P3
	BMERB1	BARD1
	PKD2	BARX1
	AL133215.2	BASP1
	ECT2	BATF3
	PLIN1	BAZ1A
	IL33	BBIP1P1
	FAM162B	BBOX1
	KIF24	BBOX1-AS1
	H2BC9	BBS10
	AC092376.2	BBS12
	TRABD2B	BBS4
	GPR84	BBS5
	MIR4653	BCAR3
	FANCD2	BCAR4
	AC092718.4	BCKDHB
	RABIF	BCL11A
	MRGPRF	BCL2
	CRTAP	BCL2A1
	DCN	BCL2L10
	SRSF5	BCL2L14
	NPR1	BCL2L2
	SLC17A7	BCL3
	BMX	BCL6
	POLE2	BCL9
	ALDH1A1	BCO1
	TMPO-AS1	BDH1
	FOSB	BEND3
	SAP30L	BEND3P1
	ATAD2	BEND5
	ANKRD30A	BEND7
	C8orf88	BET1-AS1
	LINC01586	BEX1
	OTC	BEX5
	TFR2	BFSP1
	ZCCHC24	BHLHA15
	CMA1	BHLHE40
	EHD2	BICC1
	ERG	BICD1
	RDM1	BICDL1
	S1PR1	BIRC5
	H2AX	BLACAT1
	RHOJ	BLCAP
	AC018521.6	BLM
	ARHGEF40	BLMH
	GARS1	BLOC1S3
	TTC28	BLVRA
	GALNT15	BLVRB
	AL137026.3	BMERB1
	AP003555.2	BMF
	PARP1	BMP4
	CABLES2	BMP5
	DST	BMP7
	STK32B	BMP8A
	SLC7A11	BMP8B
	ACADVL	BMPR1B
	SMC1B	BNIP2
	ADAMTS15	BNIP3P17
	LRFN5	BNIP3P30
	JAM3	BOC
	ABCA6	BOLA3-AS1
	RFC2	BORA
	PLIN4	BORCS7
	AC004490.1	BPGM
	DNA2	BPI
	EIF4B	BPIFA1
	FOXO1	BPIFB1
	IQCN	BPIFB2
	C16orf89	BPIFB3
	BMPER	BPNT1
	CNN1	BRCA1
	FOS	BRCA1P1
	ADRA2A	BRCA2
	TIMELESS	BRCC3
	SCN9A	BRF2
	CACHD1	BRI3BP
	FAM122A	BRICD5
	DDX39A	BRINP2
	ANGPTL7	BRINP3
	EDNRB	BRIP1
	KLF4	BRIX1
	LIMA1	BRSK2
	NCAPG2	BRWD1-AS2
	PPP1R14B	BRWD3
	AQP1	BTBD19
	SGO2	BTBD3
	PLAUR	BTBD7P1
	BAIAP2L1	BTF3L4P2
	PKD1L1	BTG1
	EGFEM1P	BTG2
	CCDC150	BTG3
	LINC00484	BTG3-AS1
	CES1	BTN1A1
	AQP7P4	BTN2A2
	MMRN1	BUB1
	C6orf99	BUB1B
	CIDEC	BUB3
	NATD1	BYSL
	AL024507.2	BZW1P2
	CYB5D2	BZW2
	ADAMTS9-AS2	C10orf88B
	KCTD5	C10orf90
	GPSM2	C10orf99
	C1orf112	C11orf16
	SOX11	C11orf24
	GPD1	C11orf45
	BRCA2	C11orf86
	NR3C1	C12orf4
	AC004554.1	C12orf56
	STARD9	C12orf75
	KCNA4	C13orf46
	PLPP4	C14orf132
	SLC52A2	C14orf28
	BEND3	C15orf62
	MYCT1	C16orf74
	TDRD10	C16orf87
	FRY	C17orf58
	MTURN	C17orf67
	ESR1	C18orf54
	SMC4	C19orf18
	IL11RA	C19orf38
	AC108075.1	C19orf47
	AASS	C19orf57
	INCENP	C1DP1
	ADAMDEC1	C1GALT1
	FHL5	C1orf105
	GOLGA8H	C1orf112
	PGR	C1orf115
	TPM3	C1orf131
	DNASE1L3	C1orf198
	CKAP2	C1orf21
	SESN1	C1orf74
	SHE	C1orf94
	SH2D2A	C1QL4
	LYVE1	C1QTNF4
	H2AC13	C1QTNF6
	HSPA14	C1R
	AC055876.4	C1RL
	SSBP2	C21orf58
	AC092954.2	C21orf91
	TIMP4	C22orf23
	ITPR1	C2CD4D
	MICU3	C2orf69
	ACSM5	C2orf88
	CREBL2	C3
	IGF1	C3orf18
	ARHGEF7-AS2	C3orf36
	RIPK2	C4A
	AC105345.1	C4B
	SOCS2	C4BPA
	EPAS1	C4BPB
	GAS2L3	C4orf3
	PCDHGB7	C4orf46
	TIGIT	C4orf51
	FAM72A	C5
	GCNT4	C5orf15
	HSPB6	C5orf17
	AC011239.2	C5orf22
	POP1	C5orf24
	MEOX1	C5orf34
	LAGE3	C5orf34-AS1
	COL14A1	C5orf38
	AC005089.1	C5orf46
	IGIP	C5orf49
	LINC02185	C5orf58
	CLCN6	C5orf66-AS1
	PJA2	C5orf67
	XPO5	C6orf120
	ANKRD20A5P	C6orf141
	NOTCH4	C6orf52
	HOXA5	C6orf99
	CHEK2	C7
	NECAB1	C7orf31
	RERGL	C7orf61
	TNNT3	C7orf77
	MAP1LC3C	C8G
	HCAR1	C8orf31
	DNMT3B	C8orf33
	CSAD	C8orf58
	TMEM88	C8orf88
	CAMK2N2	C9orf64
	RTL5	CA3
	PLEKHH2	CA5B
	MOCS1	CA5BP1
	ARID5B	CA8
	P2RY12	CA9
	KRTAP13-4	CAB39L
	F10	CABCOCO1
	ESM1	CABLES2
	AC129915.3	CABP7
	RHBDF2	CACHD1
	SCNM1	CACNA1B
	C1QTNF7	CACNA1C
	NTN4	CACNA1C-AS2
	AL031985.3	CACNA1I
	SCTR-AS1	CACNB1
	NUP93	CACNB3
	MYMX	CACYBP
	HSD17B13	CACYBPP2
	EDA2R	CAD
	F12	CADM3
	FAM172A	CADPS2
	CDO1	CALCA
	AC090004.2	CALCOCO1
	PNPLA7	CALCR
	HSPA12B	CALD1
	HNMT	CALML3
	LOXHD1	CALR
	TOM1L2	CAMK2D
	PHYHD1	CAMK2N1
	PROS1	CAMK2N2
	H2AZ1	CAMK4
	LMNB2	CAMKK1
	WDHD1	CAMKMT
	RABEP1	CAMKV
	EBF3	CAMLG
	RDH5	CAMP
	EGFLAM	CAMTA1-DT
	ALAD	CAMTA2
	TPRG1	CAND1
	ENPP2	CAPG
	LIMS2	CAPN11
	PDSS1	CAPN14
	PREX2	CAPN3
	INTS8	CAPN6
	NAP1L2	CAPNS2
	ADAM19	CAPS
	SAPCD2	CAPS2
	PRICKLE2	CARD10
	ACADSB	CARD17
	MIR100HG	CARD18
	NBR1	CARD9
	PI16	CARHSP1
	CCNE2	CARM1
	CAT	CARMIL2
	LIPE	CARMIL3
	LINC01415	CARMN
	SMC6	CARS1
	SNCA	CARS2
	CERT1	CARTPT
	FZD4	CASC3
	TUBA5P	CASC9
	SLC7A3	CASD1
	PAXIP1-AS2	CASK
	CCT3	CASP12
	MFAP2	CASP14
	LINCADL	CASP3
	AKAP12	CASP4
	CA9	CASP4LP
	SLC12A8	CASP5
	BCL2L2	CASP7
	KCTD12	CASP8AP2
	CFAP69	CAST
	CAV2	CASTOR3
	DSN1	CAVIN1
	LHFPL5	CAVIN4
	CAVIN1	CBFA2T3
	BTG2	CBFB
	IL4I1	CBLN2
	FAM13A	CBLN4
	SNX1	CBR4
	CLEC14A	CBS
	FLAD1	CBSL
	TBC1D31	CBWD1
	LPAR6	CBX1
	MYOC	CBX1P3
	UBAP1L	CBX2
	MAST4	CBX3
	SYBU	CBX6
	GPC2	CBX7
	SIDT2	CC2D2A
	PRRG3	CCDC121
	LRRN3	CCDC126
	AC009951.6	CCDC134
	METTL7A	CCDC136
	KLHL3	CCDC138
	VWF	CCDC144NL-AS1
	ADIPOQ	CCDC146
	RERE	CCDC150
	DPT	CCDC151
	AC068193.1	CCDC158
	CXCL2	CCDC159
	MTMR10	CCDC163
	GPRASP2	CCDC167
	LRRC59	CCDC170
	PSMD14	CCDC173
	CREBRF	CCDC18-AS1
	C20orf194	CCDC183-AS1
	RFC4	CCDC184
	DNMT3A	CCDC191
	RCC1	CCDC192
	LINC02139	CCDC28A
	PRR19	CCDC28B
	SORBS1	CCDC34
	SGCG	CCDC40
	AC015922.2	CCDC71L
	CCN4	CCDC74B
	AP001528.1	CCDC77
	EIF4A2P1	CCDC78
	DNALI1	CCDC88A
	POLR1G	CCDC89
	CSPG4P13	CCDC96
	IGBP1	CCDC9B
	CLSTN2	CCHCR1
	PLCD4	CCKBR
	AC008663.2	CCL11
	PCNA	CCL17
	BYSL	CCL20
	LCA5	CCL21
	GRIA1	CCL25
	KIF26B	CCL26
	YARS1	CCL7
	FGFR1	CCN1
	FOXCUT	CCN2
	MRPL14	CCN3
	ZFHX4-AS1	CCNA1
	ABCG2	CCNA2
	TENM2	CCNB1
	GINS2	CCNB2
	ACBD4	CCNB3
	FYCO1	CCNC
	MYOM1	CCND1
	AL034374.1	CCND2
	TBC1D9	CCND3
	KCNIP2	CCNDBP1
	GLYAT	CCNE1
	C21orf58	CCNE2
	LAMB2	CCNF
	CENPW	CCNG1
	CCDC158	CCNI
	LINC02202	CCNI2
	FAM110D	CCNJ
	LAMA3	CCNL1
	KLF2	CCNL2
	AC048382.5	CCNP
	KNTC1	CCNYL2
	ASPA	CCP110
	CALCR	CCR8
	LINC00536	CCSAP
	GPD1L	CCT3
	CHAF1B	CCT4
	TTC13	CCT5
	CNN2P8	CCT6A
	PPP1R14BP3	CCT6B
	GPR146	CCT8
	RASA4	CCZ1
	UTRN	CCZ1B
	ZFP36	CD101
	FMO2	CD151
	CXCL14	CD164
	GREM2	CD177
	PTH1R	CD1A
	DSCC1	CD200
	TMEM245	CD207
	LAMA2	CD276
	SLC39A1	CD300H
	ACOX2	CD46
	LINC00993	CD55
	MGLL	CD58
	RHOB	CD59
	SLC7A2	CD80
	EMSLR	CD83
	RNF180	CD8B2
	PARVA	CDC123
	AC100793.4	CDC20
	ZBED4	CDC25A
	AC097468.3	CDC25B
	NFE2L3	CDC25C
	LIN9	CDC42BPB
	AC093535.2	CDC42EP1
	APPL2	CDC42EP3
	MCM6	CDC42EP4
	TDRKH	CDC42EP5
	CALR	CDC45
	AC002401.2	CDC6
	HMGA1	CDC7
	AC091939.1	CDCA2
	THRSP	CDCA3
	ANGPTL2	CDCA4
	ABCA5	CDCA5
	ZNF367	CDCA7
	NXNL1	CDCA8
	PFKFB1	CDH12
	HEPACAM2	CDH19
	SQLE	CDH2
	COL4A6	CDH22
	GJB2	CDH24
	CKS1B	CDHR1
	AL157387.1	CDIP1
	HOXC11	CDIPTOSP
	ZNF726	CDK1
	RECK	CDK14
	KANK3	CDK18
	CRYBG2	CDK19
	DNAH11	CDK2
	CDCA7	CDK2AP1
	CASQ2	CDK4
	F11R	CDK5R1
	PALMD	CDK6
	PKD1P4	CDKAL1
	NNAT	CDKL2
	A2ML1	CDKN1A
	AMIGO2	CDKN1B
	ZNF483	CDKN1C
	CIDEA	CDKN2A
	DOCK1	CDKN2A-DT
	ISM1	CDKN2AIP
	TACC1	CDKN3
	SEMA3C	CDNF
	PPARG	CDR2
	KLB	CDRT15P1
	TOMM40	CDRT15P12
	BMP4	CDRT15P6
	RPS10	CDRT15P9
	MASTL	CDS2
	MIS18A	CDT1
	PABPC1P4	CDX1
	FAM241A	CDYL2
	ITM2B	CEACAM19
	RCBTB2	CEACAM5
	EID1	CEBPB
	COLGALT1	CEBPB-AS1
	PTPRB	CEBPD
	SASH1	CEBPG
	MTBP	CECR7
	TCF19	CEL
	ECM2	CELF4
	ARHGEF15	CELSR3
	GGH	CEMIP
	SSPN	CENPA
	SCN5A	CENPBD1
	TCEAL1	CENPE
	PYGM	CENPF
	POMK	CENPH
	PTGER3	CENPI
	SNX33	CENPJ
	AC084864.1	CENPK
	ZNF385D	CENPL
	SLC27A1	CENPM
	TEF	CENPN
	SYNJ2BP	CENPO
	MIR3936HG	CENPQ
	IRS1	CENPU
	ILF2	CENPV
	AC103718.1	CENPW
	PRX	CEP128
	NAALAD2	CEP135
	TUBB	CEP170
	AC093083.1	CEP192
	DNMBP	CEP250
	PLAAT5	CEP295
	CST1	CEP350
	ZNF540	CEP55
	KIF22	CEP68
	FOXK2	CEP70
	AC012464.1	CEP72
	NEK10	CEP76
	PECAM1	CEP78
	ANKMY2	CEP85
	CHST6	CEP97
	TPPP	CEPT1
	CSRNP1	CERS1
	ITGA7	CERS2
	BCL2	CERS3-AS1
	RPL39L	CERS4
	H3C12	CES2
	UBQLN4	CES4A
	ZWILCH	CFAP157
	CYP2A6	CFAP20DC
	LINC02544	CFAP251
	ABCA10	CFAP298
	MARCHF8	CFAP45
	CEMIP	CFAP47
	AL591845.1	CFAP58-DT
	SEMA6A	CFAP69
	AOX1	CFAP70
	RCC2	CFB
	AMOTL2	CFI
	CDH5	CFTR
	SCN2B	CGA
	TRPC6	CGAS
	PRKD1	CGREF1
	AC093895.1	CGRRF1
	GABPB1-IT1	CH25H
	TYMS	CHADL
	CCL20	CHAF1A
	GPAM	CHAF1B
	FAM214A	CHCHD2
	C3orf18	CHCHD2P9
	AC022360.1	CHCHD3P3
	SNRPG	CHD3
	ZNF423	CHD6
	PNPLA2	CHD7
	GFRA1	CHEK1
	FAM13B	CHEK2
	RHBDL2	CHERP
	NME1	CHFR
	MYO15B	CHGA
	AL606748.1	CHGB
	MEX3A	CHI3L2
	ADGRF5	CHIC1
	SYNGR3	CHKB-DT
	TMEM132A	CHL1
	IQANK1	CHM
	DUSP6	CHML
	TP53AIP1	CHMP2A
	TUBG2	CHMP4BP1
	ME3	CHN1
	CYRIB	CHODL
	DACT2	CHORDC1
	DNAJC9	CHP1
	LINC00641	CHPF
	AC002451.1	CHPF2
	SOX17	CHPT1
	LINC02082	CHRAC1
	ADM2	CHRD
	APOL5	CHRDL2
	GYPE	CHRM3
	ARHGEF7-AS1	CHRM4
	PTPRQ	CHRNA1
	PYCR1	CHRNA5
	RUSC1	CHST1
	SERINC1	CHST10
	OPN4	CHST15
	MRGBP	CHST3
	EGR3	CHST4
	OR2B6	CHST6
	ARL15	CHST8
	HOXC-AS3	CHURC1
	ABRACL	CIAO2A
	CD80	CIART
	SPATA20P1	CIB2
	MYO19	CIB4
	CPA1	CIC
	USP53	CILP2
	WDR4	CIP2A
	AL022316.1	CIPC
	HASPIN	CIRBP-AS1
	ACTA2-AS1	CISD1
	CTDSP2	CISD2
	AL078582.2	CISH
	TBC1D7	CIT
	SSX2IP	CITED2
	CPED1	CKAP2
	RIPPLY3	CKAP2L
	ABHD14B	CKAP4
	E2F5	CKAP5
	DGCR5	CKMT1A
	ROBO4	CKMT1B
	ASB1	CKS1B
	SLC2A4	CKS2
	H2BC19P	CLASP2
	AC104564.1	CLCA2
	ESYT1	CLCN2
	RBP4	CLCN3
	ZFP69B	CLCN6
	MSANTD3	CLDN10
	TAL1	CLDN10-AS1
	FBXO43	CLDN11
	ADGRA2	CLDN12
	OLFML2A	CLDN14
	CCL11	CLDN16
	LINC01537	CLDN23
	F3	CLDN6
	TET3	CLDN9
	ARHGAP6	CLEC2L
	EFEMP1	CLEC3A
	ZNF395	CLEC4D
	TEK	CLEC4E
	SAMD12-AS1	CLEC4F
	AC021546.1	CLEC5A
	RTKN	CLEC6A
	ARTN	CLEC7A
	JUN	CLIC1
	GABARAPL1	CLIC3
	HORMAD1	CLIC6
	EXOC1L	CLIP2
	APOD	CLIP3
	TAT	CLIP4
	PCYOX1	CLK1
	PIK3R1	CLK4
	BORCS7	CLLU1-AS1
	WDR86-AS1	CLMN
	EEPD1	CLN6
	LIMK1	CLN8
	AP005212.2	CLNS1A
	CDK15	CLPS
	CCL14	CLPSL1
	H2BU1	CLPSL2
	RANBP1	CLPTM1L
	DRAXIN	CLSPN
	LINC02580	CLSTN3
	CYP2U1	CLTC
	NRIP2	CLU
	ZNF214	CLYBL
	ADAM8	CMAHP
	KIAA0232	CMAS
	ACADS	CMBL
	NSD2	CMPK2
	NFKBIE	CMSS1
	FMOD	CMTM1
	GNAL	CMTM3
	AC243772.2	CMTM5
	GPX3	CNGA1
	AC096921.2	CNIH1
	EMX2OS	CNIH2
	DRC3	CNIH4
	FLRT2	CNKSR3
	CCNG1	CNMD
	UBE2SP1	CNN2
	ERBB4	CNOT6L
	PSMB4	CNOT9
	LVRN	CNPY3
	PIK3IP1	CNTLN
	AGAP11	CNTN3
	PTPN21	CNTN4
	TRAIP	CNTNAP2
	TTYH3	CNTNAP3
	RAB30	COA6
	AC024230.1	COA7
	AC134043.3	COCH
	HEPACAM	COG3
	SCN3B	COL10A1
	BOP1	COL11A1
	AC015922.3	COL11A2
	WSCD1	COL13A1
	HBB	COL14A1
	MAPT	COL16A1
	YPEL4	COL18A1
	ALG3	COL22A1
	VAMP3	COL23A1
	CLIC5	COL26A1
	KCND3	COL28A1
	TRIM11	COL4A5
	GGTA1	COL6A6
	CARMIL2	COL8A2
	C1orf115	COL9A1
	PCK1	COL9A3
	C1QTNF9	COLCA1
	MRPL47	COLCA2
	DNAJB11	COMMD2
	LPL	COMMD6
	SPDL1	COMP
	AFF3	COPA
	RGS22	COPG1
	SLC25A19	COPG2
	CRHBP	COPS2
	CEP112	COQ2
	SLC12A1	COQ4
	LINC02382	COQ7
	GIMAP8	CORO7
	SPATA18	COTL1
	KIF13B	COX16
	AC092295.1	COX20P1
	LINC01044	COX6B1P5
	PAFAH1B3	COX6C
	TMEM47	COX7B2
	EBF2	CPA3
	B4GALT3	CPA4
	TIMM17A	CPA6
	CTSG	CPAMD8
	LINC00922	CPB1
	AC083855.2	CPD
	H4C5	CPE
	AC007728.3	CPEB1
	RAET1K	CPEB2
	PER2	CPEB3
	CCDC152	CPLANE2
	RAET1L	CPLX1
	SLC40A1	CPLX2
	AC011477.3	CPNE1
	TSPYL2	CPNE7
	MOB4P2	CPNE8-AS1
	SMOC2	CPOX
	HERC2P9	CPP
	TRIM23	CPS1
	TSC22D3	CPSF1
	WDR76	CPSF3
	SLC16A12	CPT1A
	CCDC69	CPT1C
	VIT	CPXM1
	SLC50A1	CPXM2
	FAM136A	CR392039.3
	DNMT1	CR589904.2
	HSF2BP	CRACD
	AL158206.1	CRACDL
	TRIM66	CRADD
	SLC6A11	CRAT
	URB2	CRBN
	PFN1	CRCT1
	LTBP2	CREB3L1
	THSD7B	CREB3L2
	NAALADL1	CREBBP
	FBXO5	CREBL2
	FBXL17	CREBRF
	REEP4	CREG1
	CYP4F29P	CREM
	LINC02381	CRIM1
	ACER2	CRIM1-DT
	NACC1	CRIP1
	TAMALIN	CRIP2
	REEP5	CRISP2
	ECE1	CRLF1
	LSR	CRMP1
	ARHGEF6	CROCCP2
	NDST1	CRTAC1
	TMEM9B-AS1	CRTC2
	BARD1	CRY2
	PGM5P3-AS1	CRYBB2P1
	FBXL6	CRYBG1
	MAGOH2P	CRYBG2
	ADCY6	CRYGS
	AC067852.4	CRYL1
	ZNF724	CRYM
	PDE5A	CRYZ
	FANCC	CRYZL2P
	ZNF124	CSAD
	DGLUCY	CSAG1
	TLCD1	CSAG3
	PRDX4	CSDC2
	TFAP2A-AS1	CSE1L
	HSD17B11	CSF2
	GUCY1B2	CSGALNACT1
	EYA4	CSKMT
	AC117488.1	CSMD1
	LMO7DN-IT1	CSMD2
	WHAMMP2	CSN1S1
	LEPROT	CSN1S2AP
	SNCG	CSN2
	VIPR1	CSPG5
	N4BP2L1	CSRNP1
	AC004911.1	CSRP2
	FP325317.1	CST1
	AC068831.6	CST2
	B3GALNT2	CST3
	PGAP4	CST5
	C14orf180	CST6
	CXCL10	CSTB
	LMO7DN	CSTF2
	LSM4	CSTF3
	HSPB7	CT45A1
	LTA	CT45A10
	H2BC17	CT83
	POGK	CTAG2
	DKK3	CTD-2297D10.2
	RUNDC3B	CTDSP1
	TBX2-AS1	CTF1
	AC010996.1	CTNNA1
	CCM2L	CTNNA2
	HAGHL	CTNND1
	AL023803.2	CTPS1
	LRRC70	CTSC
	AC027228.2	CTSD
	CITED2	CTSE
	AL031777.2	CTSF
	NUDT16	CTSK
	RERG-IT1	CTSV
	BCL2L12	CTTNBP2
	ANKK1	CUEDC1
	DBNDD2	CUL2
	CHAF1A	CUTALP
	DMD	CWF19L2
	LGALS12	CWH43
	ADGRL4	CXCL1
	KANK2	CXCL10
	ANO6	CXCL11
	ATAD5	CXCL12
	OVCH2	CXCL13
	TLX1	CXCL14
	LINC02767	CXCL2
	ULBP1	CXCL3
	AR	CXCL5
	LINC02240	CXCL8
	LAMP3	CXCR4
	TSEN15	CXXC4
	CACYBP	CXXC5
	LINC02570	CYB561D1
	WDR86	CYB5D2
	VANGL1	CYB5R1
	POLI	CYB5R2
	HSPB8	CYB5R4
	AC115284.2	CYBA
	LINC02159	CYBC1
	RAMP2	CYBRD1
	AC097713.1	CYC1
	SLC19A3	CYCS
	LYRM9	CYCSP34
	EIF3L	CYCSP52
	SLC7A10	CYCSP6
	AC037459.4	CYFIP2
	ALYREF	CYP1A1
	PEX11A	CYP27A1
	EFCC1	CYP27C1
	GSEC	CYP2A6
	PELI2	CYP2A7
	AIM2	CYP2B7P
	LGI4	CYP2C8
	FLVCR1	CYP2D6
	POLA2	CYP2F1
	NDNF	CYP2G1P
	JADE1	CYP2S1
	SPTBN4	CYP2T1P
	TIPARP	CYP2W1
	AC020907.1	CYP39A1
	CXCL11	CYP4F24P
	SPTBN1	CYP4F29P
	AC004585.1	CYP4F3
	AL162171.1	CYP4V2
	ICOS	CYP4Z1
	NECTIN4-AS1	CYP51A1
	LCLAT1	CYS1
	AC006441.4	CYSRT1
	FGF2	CYTL1
	NEXN-AS1	CYYR1
	CLK1	D2HGDH
	SDS	DAAM1
	HENMT1	DACH1
	ALAS2	DACT1
	COL22A1	DACT2
	LDHD	DAG1
	DPP3	DAGLA
	ABCA13	DALRD3
	HPRT1	DANCR
	HOXA7	DAND5
	RUVBL1	DANT1
	SEMA5A	DAP3
	FCGRT	DAPK1
	AC007920.2	DAPP1
	PACSIN1	DBF4
	C2CD4D	DBF4B
	AC121251.1	DBN1
	PLAT	DBNDD1
	SEMA3D	DCAF13
	FAT4	DCAF16
	RAMP2-AS1	DCAF4
	TFPI	DCAF4L2
	PCNX1	DCAF5
	Z97989.1	DCD
	PRAME	DCHS1
	RELL2	DCK
	GAS1RR	DCLK1
	SGK2	DCLK2
	BCO2	DCLRE1A
	PARP3	DCLRE1B
	AC008738.6	DCLRE1C
	CNRIP1	DCLRE1CP1
	PNP	DCN
	SLC7A4	DCPS
	TSHZ1	DCST1-AS1
	SELP	DCST2
	AFAP1L2	DCSTAMP
	PAN2	DCT
	ELAVL2	DCTPP1
	NR5A2	DCUN1D2
	MTHFD1L	DCUN1D2-AS
	FAM161B	DCUN1D5
	GTF2IRD1	DDAH2
	RFWD3	DDB2
	BTF3	DDC
	AC008268.1	DDIAS
	RBL1	DDIT4
	YIF1B	DDN
	HRC	DDO
	AQP7P1	DDX10
	VPS72	DDX11
	H2AC18	DDX11-AS1
	KCNG1	DDX11L8
	SIK2	DDX12P
	GSTM3	DDX21
	WLS	DDX39A
	GMPS	DDX39BP1
	PGM5P4-AS1	DDX5
	MAGI1	DDX58
	RHOQP3	DDX59-AS1
	AL031846.2	DEFB1
	LRP1	DEFB109A
	C14orf132	DEFB109D
	DYNLRB2	DEFB124
	LGALS4	DEFB4A
	MEF2C-AS1	DEGS1
	PITX1	DEK
	GFUS	DELE1
	CLK4	DENND2B
	SERPINB4	DENND2C
	MYLIP	DEPDC1
	GLDN	DEPDC1B
	AC108860.2	DEPDC7
	PRSS27	DEPTOR
	TSC22D1	DERA
	AC073621.1	DEUP1
	PALM	DEXI
	CD302	DGCR11
	KNOP1	DGCR5
	MANF	DGKD
	ABLIM1	DGLUCY
	SCN11A	DHCR24
	OXTR	DHCR24-DT
	ARRDC4	DHCR7
	MTERF3	DHDH
	CDH23	DHFR
	ZHX3	DHFRP1
	AF230666.2	DHRS1
	AC007240.3	DHRS12
	SLC35F2	DHRS13
	PDLIM1	DHRS4L2
	CCDC78	DHRS7
	LINC01012	DHTKD1
	KLF15	DHX37
	BORA	DIAPH3
	PGAM5	DIO1
	RHOU	DIPK1C
	CDKN1C	DIPK2A
	MEIS3P1	DIRAS1
	LINC00634	DIRAS2
	ZNRF2P2	DIXDC1
	CTHRC1	DKC1
	CHURC1	DKK1
	AC129507.1	DKK4
	TAF7L	DKKL1
	BICDL1	DLAT
	AL590666.4	DLG4
	H2BC11	DLGAP1
	LINC02847	DLGAP1-AS1
	SOCS2-AS1	DLGAP3
	SCRN2	DLGAP5
	SLC6A9	DLK1
	AC022809.1	DLL1
	ZFP2	DLL3
	AL359697.1	DLX4
	AL353693.1	DLX5
	MRTFB	DLX6
	SPOCK3	DMBX1
	LINC01943	DMC1
	ZNF887P	DMD
	CR381670.1	DMRT1
	ADIPOQ-AS1	DMRTA2
	AL161665.2	DNA2
	ANGPT4	DNAAF2
	RANBP17	DNAAF5
	PFKFB3	DNAH1
	POU6F1	DNAH10OS
	PLAAT3	DNAH11
	ADAMTS1	DNAH14
	AC019080.1	DNAH17
	ACTL6A	DNAI4
	AC108860.1	DNAJA1
	AC063960.2	DNAJB11
	TMEM273	DNAJB14
	CHST11	DNAJB9
	WFDC21P	DNAJC1
	AC096733.2	DNAJC17
	NODAL	DNAJC18
	AC016924.1	DNAJC19P5
	TIMP3	DNAJC2
	KLF14	DNAJC27
	CLDN19	DNAJC5B
	LRWD1	DNAJC6
	ORMDL3	DNAJC9
	AP001542.1	DNAL1
	ELOVL5	DNASE1L1
	AGXT	DNASE1L2
	LIMD2	DNASE2
	PRDM5	DND1P1
	PLA2R1	DNER
	DYNC2H1	DNMBP
	ETV7	DNMT1
	APCDD1	DNMT3A
	ATP6V0B	DNMT3B
	CHAC1	DNTTIP1
	HAUS8	DOC2B
	HOTAIR	DOCK3
	RPS23	DOCK7
	ATG9B	DOCK8
	MRPL13	DOCK8-AS1
	F8	DOK4
	AC021660.4	DONSON
	CLPSL1	DOP1B
	EPYC	DOT1L
	POLD1	DPAGT1
	ATP1B2	DPEP1
	UMODL1	DPF1
	MRPS12	DPH2
	GRPR	DPP10
	RBPMS	DPP3
	MCM2	DPP6
	G0S2	DPY19L2
	H2AC11	DPYSL2
	DKC1	DPYSL3
	H4C9	DPYSL5
	DHDH	DQX1
	CDC123	DRAXIN
	CRACD	DRD4
	POP7	DSCC1
	EIF4E3	DSCR8
	STXBP1	DSG3
	AP001434.1	DSN1
	EIF3J-DT	DSTN
	DESI2	DTL
	CLCN1	DTNA
	LINC02607	DTWD1
	BCL6	DTWD2
	MCM5	DTX3L
	AC099845.1	DUS2
	CCDC68	DUSP1
	EPB41L4A-AS1	DUSP10
	CADM3-AS1	DUSP14
	NKAIN2	DUSP15
	MAP3K20	DUSP3
	HMGN2P15	DUSP5P1
	SAMD8	DUSP6
	PLAAT1	DUSP9
	RCOR2	DUTP6
	DBNDD1	DUX4L9
	NIPSNAP3B	DXO
	ZFP36L2	DYDC2
	FAM72D	DYNC2LI1
	MS4A4E	DYNLT1
	STEAP4	DYRK2
	TIE1	DYRK3
	NR2F1	DYRK3-AS1
	GABBR2	DYRK4
	TMEM52B	DZANK1
	RBMS2	DZIP1
	AC108477.1	DZIP1L
	NUDCD1	E2F1
	STARD13	E2F2
	AP000553.2	E2F3
	VN1R53P	E2F5
	CLMP	E2F7
	GIMAP6	E2F8
	SLC16A3	EAF2
	ANK2	EBNA1BP2
	PPP4R1L	ECE1
	NIBAN1	ECEL1
	RN7SL170P	ECHDC2
	GRIK3	ECI2
	P2RY6	ECT2
	SAMD5	EDAR
	LINC01497	EDDM13
	DHTKD1	EDIL3
	AL139039.2	EDN1
	ABI3BP	EDN2
	ADGRD1	EDNRA
	TMEM79	EDNRB
	NUDT5	EEF1A1
	AC092645.1	EEF1A1P6
	DENND2A	EEF1A2
	SNRPD1	EEF1AKMT3
	HOXD3	EEF1AKMT4
	AC008494.2	EEF1DP5
	CELSR3	EEF1E1
	RPL18AP7	EEF1E1P1
	NTF4	EEF2
	ZNF93	EEF2K
	BNIP3L	EEF2KMT
	CD200	EFCC1
	C5orf34	EFEMP1
	AP003548.1	EFEMP2
	AK5	EFHB
	AL442003.1	EFHC2
	AL139011.1	EFHD2
	INAVA	EFNA2
	AL049838.1	EFNA3
	SEL1L2	EFNA5
	SRSF3P1	EFNB2
	CETN4P	EFR3B
	SASS6	EGFL7
	SMS	EGFR
	B3GNT4	EGLN1
	AMY2B	EGLN2
	MMP28	EGOT
	SAP30	EGR1
	LINC02739	EGR4
	FCGR1A	EHD1
	FAM180B	EHMT2
	AC100805.1	EID1
	ENTPD7	EID3
	VWA5A	EIF1
	THBD	EIF1AXP1
	AC008738.4	EIF1B
	LRRC17	EIF1P6
	RGCC	EIF2AK2
	CNR1	EIF2D
	LYPLAL1-AS1	EIF2S3B
	SERP2	EIF3B
	CCR8	EIF3C
	FOXO4	EIF3E
	USP6	EIF3G
	NXPH3	EIF4A1P10
	GALNT16	EIF4A2
	AC011912.1	EIF4A3
	VSIR	EIF4BP3
	AC105219.3	EIF4BP6
	AP001574.1	EIF4BP7
	AC123023.1	EIF4EBP1
	SBK3	EIF4EBP3
	CX3CR1	EIF4G1
	APBB2	EIF5
	SLIT2	EIF5AL1
	FAAP24	EIF5AP4
	AC008663.3	EIF5B
	AC069113.2	EIPR1-IT1
	AC023983.2	ELAPOR2
	CRHR2	ELAVL2
	RHOT1P1	ELAVL3
	AC021148.1	ELF3-AS1
	MTX1P1	ELF4
	HGH1	ELFN1-AS1
	MYZAP	ELK3
	AL109741.1	ELL2
	GLT8D2	ELN-AS1
	HOXA2	ELOCP19
	AC004890.2	ELOVL1
	MYLK	ELOVL4
	OMD	ELOVL5
	ADH1A	ELOVL6
	CCL16	EMB
	ACOT7	EMC3-AS1
	PVT1	EME1
	HTR7P1	EMG1
	FBN2	EMID1
	HOXD4	EMILIN1
	GPR34	EML4
	HGF	EMP1
	RNU5B-4P	EMP2
	SKP2	EMSLR
	HOMER3	EN1
	C7	EN2
	SLC46A1	ENAH
	B4GALNT2	ENC1
	AC026408.1	ENDOD1
	EPHX2	ENGASE
	AC067852.3	ENHO
	TREX2	ENO1
	AL137159.1	ENO2
	AP1S1	ENOPH1
	ESAM	ENOSF1
	CTSO	ENPP1
	CTSF	ENPP2
	SEMA7A	ENPP3
	LINC02771	ENPP6
	SLC25A21-AS1	ENPP7P11
	IGFL2	ENTPD5
	TCAM1P	ENTPD7
	SOX5	ENY2
	OTUD7A	EOLA2
	AC027559.1	EP300-AS1
	BAX	EPB41L4A
	AL009178.3	EPB41L5
	PDE1A	EPGN
	SELENOI	EPHA2
	FBXL19	EPHA4
	MTFR1	EPHA7
	GFAP	EPHA8
	AL356489.2	EPHB6
	AL358075.2	EPHX2
	CACNA2D3	EPHX3
	AP001439.1	EPHX4
	RAD51-AS1	EPN2
	LINC01857	EPO
	PDE7B	EPOP
	DTYMK	EPOR
	SCN3A	EPRS1
	TMEM37	EPS8
	AC007743.1	EPYC
	OLFML1	ERCC6L
	AC011472.1	EREG
	MYADM	ERFE
	NGFR	ERGIC1
	DPY19L2	ERGIC2
	TNFRSF9	ERH
	FBXL3	ERI1
	FKBPL	ERICH2
	CYP46A1	ERLIN2
	HOXD8	ERMAP
	AC113143.1	ERMN
	ARHGAP24	ERO1A
	DARS2	ERO1B
	LINC01143	ERRFI1
	CTDSPL	ERVV-1
	PUS7	ERVV-2
	TGFB1I1	ESCO2
	CEP85	ESD
	AL356299.2	ESM1
	SETD7	ESPL1
	H3C10	ESPNL
	MSH2	ESRRB
	LRRC3B	ESX1
	TK2	ETS2
	BNIP3P17	ETV1
	HYLS1	ETV3
	AC026401.3	ETV7
	SLC25A20	ETV7-AS1
	CCT5	EVA1C
	INPP4B	EVC2
	LYPD1	EVL
	TTLL4	EXO1
	MXI1	EXO5
	SNRPA1	EXOC6
	NKX1-2	EXOSC10-AS1
	MKX-AS1	EXOSC3
	TAGLN2	EXOSC3P1
	FLT4	EXTL2
	SMYD1	EZH2
	RASA4DP	EZHIP
	RGS19	F11R
	FAM189A2	F12
	RPH3AL	F2R
	IQSEC3	F3
	AL356218.2	F5
	HOXC13	FAAH
	PFDN2	FAAP100
	AL356968.2	FAAP24
	HBA2	FABP6
	DDO	FADD
	AL357054.4	FADS1
	RMI1	FADS2
	SMIM3	FADS6
	AC138776.1	FAHD2CP
	NEDD9	FAIM2
	ADD3	FAM102B
	MTARC2	FAM107A
	AL161785.1	FAM110B
	ZNF30-AS1	FAM111A-DT
	NACAD	FAM111B
	ECSCR	FAM117A
	SCAT2	FAM117B
	STEAP2	FAM120B
	DNAJB4	FAM126A
	HOXB-AS1	FAM131B
	RSPO3	FAM131C
	RASGRF1	FAM133A
	STX1A	FAM135A
	ARPC5L	FAM136A
	AC108734.4	FAM155B
	BTD	FAM160B2
	CILP2	FAM161A
	EPS8	FAM163B
	CCN1	FAM166C
	MT1M	FAM168B
	SHMT2	FAM171A1
	DLC1	FAM171A2
	SYNE1	FAM171B
	AC092168.2	FAM172A
	MCOLN2	FAM180A
	AC090945.1	FAM189A1
	SEPTIN10	FAM193B
	H6PD	FAM198B-AS1
	H2AC19	FAM207BP
	TMSB10	FAM20C
	AP001636.1	FAM210A
	AL591686.1	FAM214A
	ROBO3	FAM216A
	EEF1E1P1	FAM217B
	FBXO45	FAM219A
	MAGOHB	FAM221A
	HOXA6	FAM222B
	AC005863.1	FAM229B
	LMO2	FAM238C
	SMARCA4	FAM240A
	XKRX	FAM241A
	ABCB11	FAM24B
	BGN	FAM27B
	AP002755.1	FAM3C
	SEPHS1P6	FAM3C2P
	GPR89A	FAM3D-AS1
	CDC14B	FAM47E
	H2BC20P	FAM50B
	SH3BP1	FAM53B
	ECHDC2	FAM71E1
	AC015726.1	FAM72A
	WHAMMP3	FAM72B
	CST3	FAM72C
	PDCD5	FAM72D
	AC022211.3	FAM78B
	AC008764.2	FAM81A
	ZNF25	FAM83A
	AC091563.1	FAM83A-AS1
	IL11	FAM83D
	SYNE3	FAM83G
	IGFBP4	FAM86DP
	FCGR1CP	FAM8A1
	ZNF204P	FAM90A1
	TCP11L2	FAM91A1
	FTO	FAM96AP2
	NCAPD2	FAN1
	EFNA4	FANCA
	GRIN2D	FANCB
	TMEM63B	FANCC
	SAA1	FANCD2
	HOXD9	FANCE
	ZNF106	FANCI
	ANXA1	FANCL
	AC012531.6	FAR1
	AFF1	FAR2
	PSMG3	FAR2P2
	AMER1	FARSB
	ADAMTS14	FAS
	PFDN6	FASN
	EBP	FASTKD1
	OR7E91P	FAXDC2
	PID1	FBLL1
	GRK3	FBLN1
	FERMT2	FBLN5
	MGARP	FBLN7
	CCBE1	FBN2
	JHY	FBN3
	BMP8A	FBXL13
	AC124319.1	FBXL14
	RANBP1P1	FBXL17
	SYN2	FBXL18
	GTPBP4	FBXL19-AS1
	AC004263.2	FBXL22
	ELN-AS1	FBXL3
	PEBP4	FBXL7
	ABCC6	FBXO10
	CCDC50	FBXO22
	Z95114.3	FBXO25
	SIX4	FBXO31
	C1QTNF6	FBXO32
	ZMAT1	FBXO36
	PPIC-AS1	FBXO4
	MCC	FBXO41
	KCNJ10	FBXO43
	CDC20P1	FBXO45
	NAV3	FBXO5
	AMMECR1	FBXO6
	TNIP3	FBXO8
	AC096589.2	FBXW4
	SETBP1	FBXW7
	IHO1	FCER1A
	ZNF175	FCGBP
	TFAP2A-AS2	FCGR1A
	CHTF18	FCGR1CP
	C6	FCGR3A
	GBAP1	FCGRT
	AC126773.4	FCHO1
	TBX15	FCHSD1
	NHSL2	FCN2
	POU5F1	FCRLB
	AC006059.4	FDFT1
	PAK5	FDPS
	LRP4	FEM1B
	PDGFRL	FEM1C
	KLHDC7A	FEN1
	GEM	FEZF1-AS1
	SOWAHD	FGA
	NUAK2	FGB
	PGPEP1	FGD1
	STAT5A	FGD5-AS1
	BLACAT1	FGF1
	PDIA4	FGF19
	PUSL1	FGF21
	MYH3	FGF7
	MYOZ2	FGF7P8
	CCDC18	FGF9
	ZNF366	FGFBP1
	LINC00504	FGFR1
	PCDHGA9	FGFR1OP2
	AC093904.2	FGFR3
	LINC00645	FH
	CASP4LP	FHDC1
	SPINDOC	FHIT
	AC027348.1	FHOD3
	CDKN2A	FIBCD1
	MCM3	FIBIN
	CDNF	FIGNL1
	GMDS	FIRRE
	UBL3	FIS1
	RANGAP1	FKBP10
	ITPRIPL1	FKBP11
	TP63	FKBP1B
	RNU6-529P	FKBP7
	AL355388.1	FKBP9P1
	MAST1	FLAD1
	PTPRT	FLNC
	PKP4-AS1	FLOT2
	HES6	FLRT3
	TFF3	FLT3
	SNED1	FLT4
	SLC25A27	FLVCR1
	TMEM252	FLVCR1-DT
	PCSK1N	FLYWCH1
	LAPTM4B	FMO1
	KIAA1841	FMO2
	RBP7	FMO4
	LINC02732	FMO6P
	RETSAT	FMOD
	KLF10	FMR1NB
	LINC00337	FNDC1-IT1
	AC009779.3	FNDC10
	PDK2	FNTA
	SLC6A17	FO393418.1
	SLURP1	FO393419.3
	ARL4A	FOCAD
	AL583834.1	FOS
	IDH2	FOSB
	RBM43	FOSL1
	FAM149A	FOSL2
	C4orf46	FOXC1
	MCM7	FOXC2
	MYL9	FOXCUT
	TNFSF12	FOXD1
	EPDR1	FOXD2
	MFSD12	FOXD2-AS1
	LPAR2	FOXD3
	DHCR7	FOXD3-AS1
	ACTL8	FOXF2
	ZDHHC13	FOXG1
	EOGT	FOXI2
	PPP1R1A	FOXI3
	SBK1	FOXJ1
	ELF3-AS1	FOXK1
	COL17A1	FOXK2
	RBMS3-AS3	FOXL1
	AC007786.1	FOXM1
	VSIG2	FOXO3
	ARHGAP39	FOXO3B
	CACNA2D1	FOXO4
	AL353621.1	FOXO6
	PDZRN4	FOXP1
	XPC	FOXP4
	TMEM100	FOXP4-AS1
	ELMOD3	FOXRED2
	NPR2	FP565260.1
	NCS1	FP565260.3
	WSCD2	FP671120.7
	CDC25B	FPR2
	SMAD3	FRA10AC1
	CD99L2	FRAS1
	PALM2AKAP2	FRAT1
	NUP210	FRAT2
	SUV39H1	FREM2
	FOXN3	FRG1BP
	GRIK5	FRG1DP
	HMGCS2	FRG1FP
	RPL5P30	FRG1GP
	THSD4	FRG1HP
	TYMSOS	FRG1JP
	SIGLEC17P	FRGCA
	FN1	FRMD4B
	ZNF730	FRMD5
	CMYA5	FRMD6
	SNRPGP2	FRMD8
	PDCD1	FRMPD1
	AL390208.1	FRMPD3
	TEAD4	FRS2
	AL139339.1	FRY
	AC022146.2	FRZB
	LINC02198	FSCN1
	AC109322.1	FSD1
	RPS6KA2	FSD1L
	H3C2	FST
	DMXL1	FTCD
	MRPL15	FTCDNL1
	CDC14A	FTH1P11
	BDH2	FTH1P12
	LINC01028	FTH1P15
	RPUSD1	FTH1P16
	RHPN1-AS1	FTH1P23
	RHEBL1	FTHL17
	THPO	FTOP1
	AC005899.6	FUCA1
	DOC2B	FUCA2
	HSD11B1-AS1	FURIN
	AC084880.3	FUT10
	RRP1	FUT3
	IRAG1	FUT6
	AP000821.2	FUT8
	FGF14-AS2	FUZ
	ETFDH	FXN
	ACTA2	FXYD5
	AC009097.2	FYCO1
	MXD3	FZD10-AS1
	AC087482.1	FZD2
	AC121247.1	FZD6
	DCLK1	FZD8
	KAT2B	FZD9
	SMIM10L2A	G2E3
	PCDHB4	G6PD
	HAS3	GABARAPL2
	APOO	GABBR1
	SYNM	GABBR2
	AFAP1-AS1	GABPB1-AS1
	HCAR2	GABPB1-IT1
	LINC02308	GABRA3
	PSMG1	GABRA5
	GYPC	GABRB3
	AXIN2	GABRD
	CGAS	GABRQ
	ATAD3A	GACAT2
	LINC01508	GADD45A
	AC022211.1	GADD45B
	HSDL2	GAL
	AC136424.2	GAL3ST2
	CYTOR	GAL3ST4
	RHNO1	GALC
	IRS2	GALNS
	PTPRM	GALNT10
	TMPO	GALNT13
	TSSC2	GALNT14
	LINC01894	GALNT16
	CYP4B1	GALNT18
	AL022334.1	GALNT2
	PRR7-AS1	GALNT5
	LINC01094	GALT
	STARD8	GAMT
	GYG2	GAPDH
	ERMN	GAPDHP1
	KLHL13	GAPDHP35
	ZBP1	GAPDHP40
	LAD1	GAPDHP63
	RASD1	GAPDHP65
	IVD	GAPLINC
	MTUS1	GAREM1
	PRAC2	GAREM2
	MIR22HG	GARNL3
	LRRC15	GARRE1
	RNF112	GARS1
	CYGB	GART
	AC011503.2	GAS1
	FZD10-AS1	GAS1RR
	UQCC2	GAS2
	AC007998.3	GAS2L3
	AL355355.1	GAS6
	AC137723.1	GAS6-DT
	LCE3A	GAS7
	AC003986.3	GASK1A
	AL031429.2	GASK1B
	ZNF781	GATA2
	SLC16A2	GATA5
	AC112721.2	GATA6
	PPP1R15A	GATA6-AS1
	ATP5MC1P4	GATAD2A
	STOM	GATAD2B
	C1orf21	GATM
	SERPINI1	GBA
	CR381653.2	GBAP1
	TRAF2	GBP1
	CMC2	GBP2
	HID1-AS1	GBX2
	SEM1	GCA
	CLEC1A	GCH1
	AP002840.2	GCNT3
	ANTXR2	GCNT4
	SLC2A1	GDAP2
	AC025175.1	GDF11
	LEMD1	GDF15
	FRMD6	GDF5
	AC019131.2	GDI2
	AC145207.9	GDPD2
	KIF13A	GDPD3
	LINC01588	GEM
	PTPRN2	GEMIN2
	TPI1	GEMIN8P4
	ANKRD22	GEN1
	LINC01842	GFPT1
	EMP1	GFRA1
[truncated: 4,175 more rows]
